# Supplementary material
Source: MDPI journal article supplement (https://www.mdpi.com/1424-2818/8/4/25)
Supplement: s1 [file s1]

## Supplementary Materials: The Influence of Water Currents on Movement Patterns on Sand in the Crown-of-Thorns Seastar (*Acanthaster cf. solaris*)

Robert Sigl and Christian Laforsch

**Table S1.** Compass directions after several hours or days of *A. cf. solaris* in Temae.

| Animal # | Treatment | Compass Direction [°] |
|----------|-----------|-----------------------|
| 1        | fed       | 256.0                 |
| 2        | fed       | 241.9                 |
| 3        | fed       | 241.3                 |
| 4        | fed       | 283.3                 |
| 5        | fed       | 265.9                 |
| 6        | fed       | 233.2                 |
| 7        | fed       | 232.7                 |
| 8        | fed       | 238.3                 |
| 9        | fed       | 115.8                 |
| 10       | fed       | 251.2                 |
| 11       | fed       | 249.9                 |
| 1        | starved   | 190.3                 |
| 2        | starved   | 254.4                 |
| 3        | starved   | 218.5                 |
| 4        | starved   | 252.2                 |
| 5        | starved   | 250.6                 |
| 6        | starved   | 257.0                 |
| 7        | starved   | 222.0                 |
| 8        | starved   | 233.9                 |
| 1        | blinded   | 171.6                 |
| 2        | blinded   | 253.7                 |
| 3        | blinded   | 252.6                 |
| 4        | blinded   | 244.6                 |
| 5        | blinded   | 255.7                 |
| 6        | blinded   | 235.9                 |
| 7        | blinded   | 247.2                 |
| 8        | blinded   | 270.5                 |
| 9        | blinded   | 289.8                 |
| 10       | blinded   | 248.5                 |
| 11       | blinded   | 77.0                  |

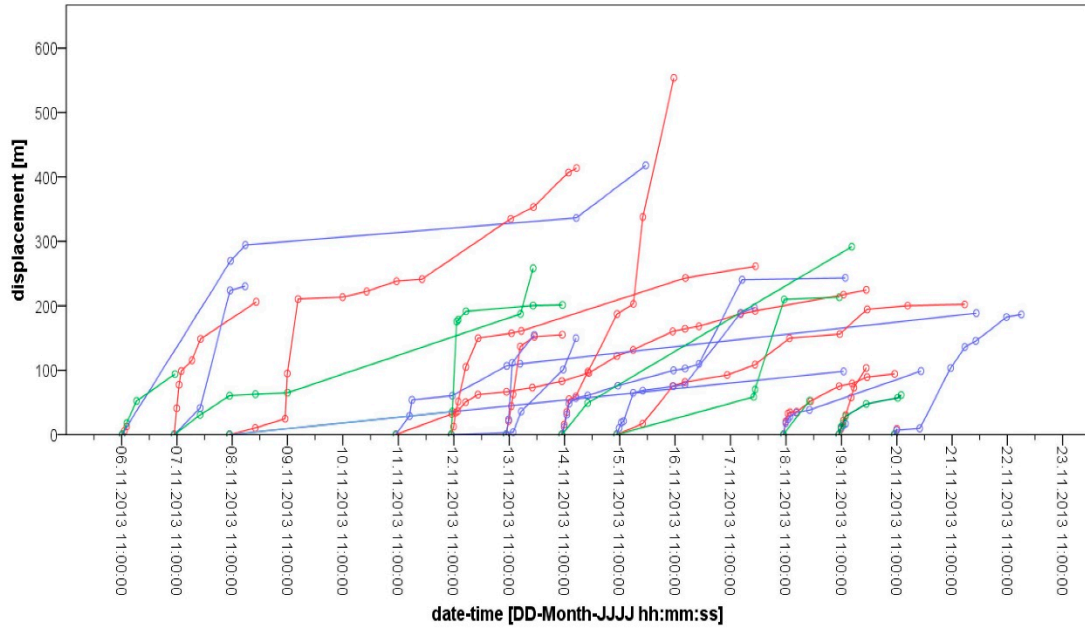

**Figure S1.** Overview of release and tracking time and date and distances moved in-between by *A. cf. solaris* in Temae. Lines represent single individuals. The time and date of release is where displacement is zero. Open circles represent data points where the individuals were recaptured. **Blue** lines are starved individuals; **green** are fed individuals; and **red** lines represent individuals that are blinded.
